# Supplementary material
Source: Elsevier journal article supplement (https://www.sciencedirect.com/science/article/pii/S2387020620304587)
Supplement: mmc1 [file S2387020620304587:mmc1.doc]

| **Table 2. Laboratory findings of patients with COVID-19 pneumonia** | | | | | |  |
| --- | --- | --- | --- | --- | --- | --- |
|  | **Total (n=194)** | **Confirmed (n=173*)** | **Clinically diagnosed (n=21*)** | **P value** | **Estimated sample size** | |
| Hemoglobin, g per L | 124.48(114.75-138.00) | 126.86(116.00-139.00) | 104.86(82.00-130.50) | 0.001 | 91 VS 11 | |
| Alanine aminotransferase U/L | 47.58(15.00-38.00) | 33.74(16.00-38.00) | 161.57(12.50-52.50) | 0.645 |  | |
| Aspartate aminotransferase U/L | 54.02(20.00-42.25) | 37.05(27.00-42.00) | 193.81(18.00-54.00) | 0.830 |  | |
| Albumin, g/L | 34.61(30.58-38.33) | 34.66(30.60-39.20) | 34.18(30.45-36.35) | 0.741 |  | |
| Total bilirubin, umol/L | 13.95(6.65-14.20) | 11.08(6.80-14.15) | 37.56(5.50-19.25) | 0.985 |  | |
| Lactate dehydrogenase, U/L | 350.80(215.00-444.50) | 348.09(214.00-433.00) | 373.14(255.50-505.00) | 0.601 |  | |
| Blood urea nitrogen, mmol/L | 8.77(4.00-8.20) | 6.73(3.95-7.55) | 25.57(4.60-18.70) | 0.045 | 239 VS 29 | |
| Creatinine, umol/L | 117.89(59.00-94.00) | 103.53(58.50-93.00) | 236.19(68.00-198.50) | 0.084 |  | |
| Prothrombin time, second | 14.68(13.50-15.05) | 14.46(13.45-14.80) | 16.58(13.93-15.58) | 0.019 | 329 VS 38 | |
| INR | 1.64(1.02-1.18) | 1.68(1.01-1.15) | 1.35(1.06-1.23) | 0.839 |  | |
| D-dimer, ug/mL | 3.46(0.37-2.78) | 3.12(0.33-2.65) | 6.40(0.98-11.46) | 0.016 | 285 VS 33 | |
| Procalcitonin ng/mL | 0.86(0.03-0.29) | 0.89(0.03-0.25) | 0.61(0.04-0.85) | 0.808 |  | |
| BNP pg/mL | 2609.28(72.00-1108.00) | 1873.17(69.50-992.50） | 8702.67(183.25-9150.25) | 0.009 | 224 VS 27 | |
| IgM, AU/ml | 97.05(11.62-92.70) | 104.42(13.47-99.85) | 3.41(1.61-4.98) | <0.001 | 102 VS 8 | |
| IgG, AU/ml | 188.62(138.99-234.16) | 203.03(149.45-240.99) | 5.54(1.89-6.61) | <0.001 | 13 VS 2 | |
| Antibody detection after onset, day | 31.00(26.00-38.00) | 31.31(27.00-38.00) | 27.10(13.00-45.50) | 0.248 |  | |
| Leucocytes, × 10⁹ per L | 7.80(4.83-8.88) | 7.74(4.82-8.49) | 8.35(5.58-11.59) | 0.574 |  | |
| Neutrophil percentage | 73.95(64.18-86.43) | 73.77(63.95-86.40) | 75.43(65.25-86.80) | <0.001 |  | |
| Neutrophils, × 10⁹ per L | 6.12(3.12-7.12) | 6.08(3.01-6.98) | 6.49(3.86-9.43) | 0.704 |  | |
| Lymphocyte percentage | 17.04(8.15-25.05) | 17.08(8.10-25.10) | 16.71(8.00-24.60) | <0.001 |  | |
| Lymphocytes, × 10⁹ per L | 1.07(0.64-1.41) | 1.04(0.62-1.41) | 1.24(0.69-1.44) | 0.190 |  | |
| Monocytes, × 10⁹ per L | 0.51(0.35-0.59) | 0.51(0.34-0.59) | 0.53(0.38-0.71) | 0.619 |  | |
| Eosinophils, × 10⁹ per L | 0.08(0-0.11) | 0.09(0-0.11) | 0.06(0-0.10) | 0.451 |  | |
| Basophils, × 10⁹ per L | 0.02(0.01-0.03) | 0.02(0.01-0.03) | 0.02(0.01-0.03) | 0.869 |  | |
| Platelets, × 10⁹ per L | 218.31(150.00-278.00) | 220.00(149.50-288.50) | 204.38(161.00-268.00) | 0.486 |  | |
| IL1β, pg/mL | 8.70(0-0) | 2.20(0-0) | 60.39(0-8.70) | 0.149 |  | |
| IL2R, U/mL | 941.77（415.00-1263.00） | 923.18(401.00-1263.00) | 1089.62(444.50-1597.50) | 0.369 |  | |
| IL6, pg/mL | 58.00(3.06-52.87) | 60.16(2.99-56.76) | 40.70(9.81-44.23) | 0.518 |  | |
| IL8, pg/mL | 32.31(9.70-33.60) | 32.02(9.70-30.10) | 34.65(9.13-47.38) | 0.827 |  | |
| IL10, pg/mL | 5.95(0-8.50) | 5.86(0-8.20) | 6.74(0-9.60) | 0.745 |  | |
| TNFa, pg/mL | 10.36(6.20-13.40) | 10.35(6.20-13.30) | 10.47(5.95-14.78) | 0.943 |  | |
| T cells (CD3+CD19-) /ul | 753.71(331.00-1071.00) | 777.22(317.00-1084.50) | 467.67(294.75-634.25) | 0.126 |  | |
| B cells (CD3-CD19+) /ul | 146.47(59.000-187.00) | 148.81(63.00-192.00) | 118.00(38.75-193.00) | 0.517 |  | |
| Th cells (CD3+CD4+) /ul | 482.75(209.00-694.00) | 497.37(209.50-746.50) | 304.83(157.00-425.25) | 0.145 |  | |
| Ts cells (CD3+CD8+) /ul | 241.90(76.00-351.00) | 251.84(86.50-351.00) | 121.00(50.75-164.25) | 0.102 |  | |
| NK cells (CD3-/CD16+CD56+) /ul | 150.80(48.00-212.00) | 155.97(52.50-218.00) | 87.83(10.25-140.50) | 0.227 |  | |
| T cells+B cells+NK cells /ul | 1050.97(472.00-1536.00) | 1082.00(477.50-1537.00) | 673.50(335.75-877.75) | 0.125 |  | |
| Th/Ts | 2.63(1.54-3.20) | 2.53(1.54-2.99) | 3.78(2.10-5.06) | 0.087 |  | |

* lymphocyte subsets were tested in 85 patients (79 confirmed, 6 Clinically diagnosed ).

Data are mean (IQR), where N is the total number of patients with available data. p values comparing Confirmed and Clinically diagnosed cases are from T test, or Mann-Whitney U test. COIVD19= coronavirus disease 2019. INR,International standardized ratio,NK cells = natural killer cells, Th cells = helper T cells, Ts cells = suppressor T cells. **Estimated sample size: estimated sample size of confirmed group VS estimated sample size of clinically diagnosed**

One of the findings of this study：the study found that the expressions of IgM and IgG in the clinically diagnosed group were significantly lower than those in the confirmed group (IgM 3.41 vs 104.42 AU/ml, *P* <0.001; IgG 5.54 vs 203.03 AU/ml, *P* <0.001). According to the calculation of the estimated sample size, the actual sample size of these indicators was significantly larger than the estimated sample size, So the Statistical power is over 0.8 in this study

| **Table 3 Comparison of related parameters between survival and died group** | | | | | |  | |
| --- | --- | --- | --- | --- | --- | --- | --- |
|  | **Total(n=194)** | **Survival(n=148)** | **Died(n=46)** | **P value** | **Estimated sample size** | |  |
| **Age,mean (SD), years** | 62.55(14.18) | 60.30(14.56) | 69.76(10.00) | <0.001 | 55 VS 17 | |  |
| **Sex n(%)** |  |  |  | 0.104 |  | |  |
| Male | 115(59.28) | 83(56.08) | 32(69.57) |  |  | |  |
| Female | 79(40.72) | 65(43.92) | 14(30.43) |  |  | |  |
| **Any comorbidities n(%)** |  |  |  |  |  | |  |
| Hypertension | 73(37.63) | 54(36.49) | 19(41.30) | 0.556 |  | |  |
| Diabetes | 39(20.10) | 29(19.59) | 10(21.74) | 0.751 |  | |  |
| Cardiovascular disease | 18(9.28) | 12(8.11) | 6(13.04) | 0.314 |  | |  |
| COPD | 11(5.67) | 7(4.73) | 4(8.70) | 0.310 |  | |  |
| Malignancy | 13(6.70) | 7(4.73) | 6(13.04) | 0.049 |  | |  |
| Chronic renal disease | 13(6.70) | 12(8.11) | 1(2.17) | 0.161 |  | |  |
| **Group n(%)** |  |  |  | 0.272 |  | |  |
| Confirmed | 173(89.18) | 134(90.54) | 39(84.78) |  |  | |  |
| Clinically diagnosed | 21(10.82) | 14(9.46) | 7(15.22) |  |  | |  |
| Hospital stay,days | 18.77(10.99) | 19.28(11.84) | 17.13(7.48) | 0.247 |  | |  |
| Hemoglobin, g per L | 124.48(21.53) | 123.83(19.65) | 126.57(26.86) | 0.453 |  | |  |
| Alanine aminotransferase,U/L | 47.58(192.65) | 29.91(26.75) | 104.43(390.53) | 0.007 | 261 VS 81 | |  |
| Aspartate aminotransferase,U/L | 54.02(239.87) | 31.57(21.90) | 126.22(488.09) | <0.001 | 242 VS 75 | |  |
| Albumin,g/L | 34.61(6.31) | 35.84(6.18) | 30.64(4.99) | <0.001 | 39 VS 12 | |  |
| Total bilirubin,umol/L | 13.95(36.39) | 10.31(5.77) | 25.65(73.39) | <0.001 | 222 VS 69 | |  |
| Lactate dehydrogenase,U/L | 350.80(206.58) | 306.83(167.65) | 492.26(253.79） | <0.001 | 42 VS 13 | |  |
| Blood urea nitrogen,mmol/L | 8.77(21.65) | 8.24(24.48) | 10.50(6.92) | 0.538 |  | |  |
| Creatine,umol/L | 117.89(168.78) | 116.18(174.36) | 123.39(151.08) | 0.801 |  | |  |
| Prothrombin time,second | 14.68(3.48) | 14.01(1.67) | 16.90(6.08) | <0.001 | 60 VS 18 | |  |
| INR | 1.64(6.77) | 1.72(7.72) | 1.39(0.70) | 0.777 |  | |  |
| D-dimer,ug/mL | 3.46(5.63) | 2.38(4.30) | 7.01(7.73) | <0.001 | 56 VS 17 | |  |
| Procalcitonin,ng/mL | 0.86（4.92） | 0.72(4.89) | 1.30(5.06) | 0.498 |  | |  |
| BNP,pg/mL | 2609.28（8815.92） | 2566.23  (9742.83) | 2733.42  (5401.05) | 0.951 |  | |  |
| IL1β,pg/mL | 8.70（84.43） | 10.59(97.16) | 2.89(6.90) | 0.601 |  | |  |
| IL2R,U/mL | 941.77(778.11) | 839.42(766.33) | 1255.82（736.47） | 0.002 | 110 VS 34 | |  |
| IL6,pg/mL | 58.00(126.54) | 33.72(75.24) | 130.85(201.66) | <0.001 | 68 VS 21 | |  |
| IL8,pg/mL | 32.31(50.49) | 28.47(51.83) | 44.11(44.62) | <0.001 | 315 VS 98 | |  |
| IL10,pg/mL | 5.95(11.32) | 5.06(9.93) | 8.69(14.61) | 0.065 |  | |  |
| TNFa,pg/mL | 10.36(6.90) | 9.59(6.70) | 12.74(7.04) | 0.008 | 158 VS 49 | |  |
| Leucocytes, × 10⁹ per L | 7.80(4.70) | 7.10(4.68) | 10.08(4.04) | <0.001 | 71 VS 22 | |  |
| Neutrophil percentage | 73.95(13.56) | 70.13(12.96) | 86.24(6.15) | <0.001 |  | |  |
| Neutrophils, × 10⁹ per L | 6.12(4.70) | 5.29(4.63) | 8.81(3.87) | <0.001 | 48 VS 15 | |  |
| Lymphocyte percentage | 17.04(10.40) | 19.95(10.04) | 7.67(4.21) | <0.001 | 10 VS 3 | |  |
| Lymphocytes, × 10⁹ per L | 1.07(0.64) | 1.18(0.66) | 0.68(0.33) | <0.001 | 32 VS 10 | |  |
| Monocyte, × 10⁹ per L | 0.51(0.25) | 0.50(0.24) | 0.53(0.30) | 0.895 |  | |  |
| Eosinophils, × 10⁹ per L | 0.08(0.14) | 0.10(0.13) | 0.04(0.15) | 0.012 |  | |  |
| Basophils, × 10⁹ per L | 0.02(0.02) | 0.02(0.03) | 0.02(0.01) | 0.074 |  | |  |
| Platelets, × 10⁹ per L | 218.31(96.62) | 226.60(88.55) | 191.63(116.04) | 0.032 |  | |  |
| T cells (CD3+CD19-)/u | 753.71(475.97) | 965.06(421.16) | 322.88(223.97) | <0.001 | 10 VS 3 | |  |
| B cells (CD3-CD19+)/u | 146.47(110.92) | 162.34(111.34) | 114.12(104.79) | 0.069 |  | |  |
| Th cells (CD3+CD4+)/u | 482.75(310.41) | 612.47(277.33) | 218.31(179.59) | <0.001 | 10 VS 3 | |  |
| Ts cells (CD3+CD8+)/u | 241.90(187.99) | 316.26(181.77) | 90.31(76.92) | <0.001 | 10 VS 3 | |  |
| NK cells (CD3-/CD16+CD56+)/u | 150.80(132.03) | 202.23(130.72) | 45.96(42.49) | <0.001 | 10 VS 3 | |  |
| T cells+B cells+NK cells/u | 1050.97（625.27） | 1329.62(553.33) | 482.96(287.76) | <0.001 | 10 VS 3 | |  |
| Th/Ts | 2.63(1.72) | 2.28(1.39) | 3.33(2.11) | <0.001 |  | |  |

Data are mean (SD).n (%), or n/N (%), where N is the total number of patients with available data. p values comparing survival and died cases are from T test, or Mann-Whitney U test. COIVD19 = coronavirus disease 2019, NK cells = natural killer cells, Th cells = helper T cells, Ts cells = suppressor T cell. Estimated sample size: estimated sample size of survivors VS estimated sample size of deaths

One of the conclusions drawn by this study：Older age, lower albumin levels, higher serum Lactate dehydrogenase (LDH) levels, higher D-D levels, longer prothrombin time (PT), higher IL-6 levels, lower lymphocytes and their subtypes counts indicated poor prognosis in patients with COVID-19 pneumonia. According to the calculation of the estimated sample size, the actual sample size of these indicators was significantly larger than the estimated sample size, So the Statistical power is over 0.8 in this study
